# Supplementary material
Source: HighWire-hosted journal article supplement (https://erj.ersjournals.com/content/55/3/2000104)
Supplement: inline-supplementary-material-1 [file inline-supplementary-material-1.pdf]

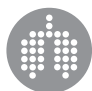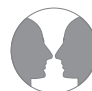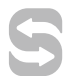

SHAREABLE PDF

# Systemic potency of fluticasone in asthma

Brian Lipworth, Chris RuiWen Kuo and Rory Chan

**Affiliation:** Scottish Centre for Respiratory Research, University of Dundee, Ninewells Hospital and Medical School, Dundee, UK.

**Correspondence:** Brian Lipworth, Scottish Centre for Respiratory Research, University of Dundee, Ninewells Hospital and Medical School, Dundee, DD1 9SY, Scotland, UK. E-mail: [b.j.lipworth@dundee.ac.uk](mailto:b.j.lipworth@dundee.ac.uk)

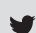

@ERSpublications

**Use of high dose fluticasone propionate requires similar considerations as starting maintenance low dose prednisone** <http://bit.ly/3aLXcjO>

**Cite this article as:** Lipworth B, Kuo CRW, Chan R. Systemic potency of fluticasone in asthma. *Eur Respir J* 2020; 55: 2000104 [<https://doi.org/10.1183/13993003.00104-2020>].

This single-page version can be shared freely online.

## *To the Editor:*

We read with interest the data from MAIJERS *et al.* [1], suggesting that in a *post hoc* analysis of trials in oral corticosteroid (OC)-dependent asthma, the majority of the OC-sparing effects of high-dose inhaled corticosteroids are due to their systemic effects. The meta-regression estimates showed a prednisone (Pred) decrease of 4.9 mg per 1.0 mg increase in fluticasone propionate (FP) dose. This was based on the premise from an analysis of two studies where 1.0 mg FP was equivalent to 5.0 mg Pred for cortisol suppression, although this was only calculated in reference to a 10 mg dose of Pred. A ratio of 1.02 was then inferred for the proportion of the OC-sparing effect due to systemic absorption of FP.
